# Supplementary material for: Characteristics of nursing homes and early preventive measures associated with risk of infection from COVID-19 in Lazio region, Italy: a retrospective case–control study
Source: HighWire-hosted journal article supplement (doi:10.1136/bmjopen-2022-061784), 2022-06-01
Supplement: bmjopen-2022-061784supp001_data_supplement.pdf [file bmjopen-2022-061784supp001_data_supplement.pdf]

Supplementary Table 2 - List of information collected through the compulsory survey administered by the Local Health Unit (Items 01-19) and other information collected from other sources (Extra 01-04). For survey the 3 possible responses are in columns Class 1-2-3

| #        | ITEM                                                                                                                                          | English                                                                                                                      | Class 1 | Class 2           | Class 3       | Source                     | Type                         |
|----------|-----------------------------------------------------------------------------------------------------------------------------------------------|------------------------------------------------------------------------------------------------------------------------------|---------|-------------------|---------------|----------------------------|------------------------------|
| Item 01  | Numerosità dei pazienti                                                                                                                       | Number of patients                                                                                                           | 1-15    | 16-40             | >40           | LHU                        | Organisational               |
| Item 02  | Presenza di stanze multiple                                                                                                                   | Presence of multiple rooms                                                                                                   |         | 0 up to 2         | more than 3   | LHU                        | Organisational               |
| Item 03  | Proporzione di stanze singole (%sul totale)                                                                                                   | Proportion of single rooms (% of total)                                                                                      | 100-60  | 59-20             | 19-0          | LHU                        | Organisational               |
| Item 04  | Turni di staff sanitario e non sanitario                                                                                                      | Shifts of healthcare and non-healthcare staff                                                                                | daily   | weekly            | bi-weekly     | LHU                        | Organisational               |
| Item 05  | Ditte di pulizie esterne                                                                                                                      | External cleaning companies                                                                                                  | No      | partially         | only external | LHU                        | Organisational               |
| Item 06  | Presenza di zona grigia per staff sanitario e non sanitario                                                                                   | Presence of a grey area for healthcare and non-healthcare staff                                                              | Present | under preparation | Absent        | LHU                        | Measures to contain epidemic |
| Item 07  | Ambienti privati per staff sanitario e non sanitario (spogliatoi)                                                                             | Private environments for healthcare and non-healthcare staff (changing rooms)                                                | Present | under preparation | Absent        | LHU                        | Organisational               |
| Item 08  | Struttura con più edifici                                                                                                                     | Structure with several buildings                                                                                             |         | 0                 | 2 >2          | LHU                        | Organisational               |
| Item 09  | Presenza di ingressi separati per l'edificio                                                                                                  | Presence of separate entrances for the building                                                                              | Yes     | Partly            | No            | LHU                        | Organisational               |
| Item 10  | Presenza di ambienti idonei per l'isolamento dei positivi                                                                                     | Presence of suitable environments for the isolation of positives                                                             | Yes     | Partly            | No            | LHU                        | Organisational               |
| Item 11  | Sorveglianza attiva dello staff sanitario e non sanitario (rilevazione temperatura corporea all'entrata e all'uscita)                         | Active surveillance of health and non-health staff (detection of body temperature at entrance and exit)                      | Present | under preparation | Absent        | LHU                        | Measures to contain epidemic |
| Item 12  | Uso di dispositivi per la protezione individuale (mascherine), e procedure per lavaggio mani, utilizzo di indumenti monouso, gestione rifiuti | Use of personal protective equipment (masks), and procedures for washing hands, use of disposable clothing, waste management | Present | under preparation | Absent        | LHU                        | Measures to contain epidemic |
| Item 13  | Formazione del personale su procedure per il contenimento del COVID-19                                                                        | Staff training on procedures for containing COVID-19                                                                         | Present | under preparation | Absent        | LHU                        | Measures to contain epidemic |
| Item 14  | Formazione degli ospiti residenti su procedure per il contenimento del COVID-19                                                               | Training of resident guests on procedures for containing COVID-19                                                            | Present | under preparation | Absent        | LHU                        | Measures to contain epidemic |
| Item 15  | Sorveglianza attiva degli ospiti residenti (rilevazione temperatura corporea due volte al giorno)                                             | Active surveillance of resident guests (body temperature detection twice per day)                                            | Present | under preparation | Absent        | LHU                        | Measures to contain epidemic |
| Item 16  | Presenza di una procedura operativa (scritta) per la gestione di casi positivi o sospetti per COVID-19                                        | Presence of an operational procedure (written) for the management of positive or suspected cases for COVID-19                | Present | under preparation | Absent        | LHU                        | Measures to contain epidemic |
| Item 17  | Presenza di una procedura operativa (scritta) sull'ammissione di nuovi ospiti rispetto al rischio di COVID-19                                 | Presence of an operational procedure (written) on the admission of new guests with respect to the risk of COVID-19           | Present | under preparation | Absent        | LHU                        | Measures to contain epidemic |
| Item 18  | Accesso di fornitori esterni (catering, lavanderia, etc.)                                                                                     | Access by external suppliers (catering, laundry, etc.)                                                                       | Present | Partial           | Absent        | LHU                        | Organisational               |
| Item 19  | Nuove ammissioni negli ultimi 15 giorni                                                                                                       | New admissions in the last 15 days                                                                                           | No      |                   | 1 >1          | LHU                        | Measures to contain epidemic |
| Extra 01 |                                                                                                                                               | Incidence of COVID-19 in the area                                                                                            |         |                   |               | Protezione Facility's area |                              |
| Extra 02 |                                                                                                                                               | Number of days opened to visitors                                                                                            |         |                   |               | LHU                        | Measures to contain epidemic |
| Extra 03 |                                                                                                                                               | Location Urban/rural                                                                                                         | Rural   | Urban             |               | Google Maps                | Organisational               |
| Extra 04 |                                                                                                                                               | Member of staff tested positive                                                                                              |         |                   |               | LHU                        |                              |
